# Supplementary material for: Profiling of Tumor-Infiltrating Immune Cells and Their Impact on Survival in Glioblastoma Patients Undergoing Immunotherapy with Dendritic Cells
Source: MDPI journal article supplement (doi:10.3390/ijms25105275), 2024-05-12
Supplement: s1 [file s1]

| Variable                      | by Variable                   | Spearman $\rho$ | Prob>  $\rho$ |
|-------------------------------|-------------------------------|-----------------|---------------|
| Overall Survival              | living cells                  | -0,1264         | 0,6062        |
| Overall Survival              | HLADR+                        | -0,0614         | 0,8027        |
| Overall Survival              | PD-L1+                        | 0,0931          | 0,7047        |
| Overall Survival              | CD86+                         | -0,2264         | 0,3513        |
| Overall Survival              | CD45+                         | -0,2726         | 0,2588        |
| Overall Survival              | HLADR+/CD45+                  | -0,0290         | 0,9063        |
| Overall Survival              | CD45+/PD-L1+                  | 0,3098          | 0,1968        |
| Overall Survival              | CD45+/CD86+                   | -0,0237         | 0,9233        |
| Overall Survival              | CD45+/CD11b+                  | -0,1659         | 0,4974        |
| Overall Survival              | CD45+/CD11b+/CD14+            | -0,1790         | 0,4634        |
| Overall Survival              | CD45+/CD11b+/CD14+/HLADR+     | 0,0707          | 0,7735        |
| Overall Survival              | CD45+/CD11b+/CD14+/PD-L1+     | 0,3721          | 0,1167        |
| Overall Survival              | CD45+/CD11b+/CD14+/CD86+      | -0,2361         | 0,3306        |
| Survival since 1st recurrence | living cells                  | -0,1936         | 0,4565        |
| Survival since 1st recurrence | HLADR+                        | 0,2181          | 0,4003        |
| Survival since 1st recurrence | PD-L1+                        | 0,4510          | 0,0692        |
| Survival since 1st recurrence | CD86+                         | -0,1569         | 0,5477        |
| Survival since 1st recurrence | CD45+                         | 0,0270          | 0,9182        |
| Survival since 1st recurrence | HLADR+/CD45+                  | 0,1961          | 0,4507        |
| Survival since 1st recurrence | CD45+/PD-L1+                  | 0,5907          | 0,0125*       |
| Survival since 1st recurrence | CD45+/CD86+                   | 0,0049          | 0,9851        |
| Survival since 1st recurrence | CD45+/CD11b+                  | -0,1422         | 0,5863        |
| Survival since 1st recurrence | CD45+/CD11b+/CD14+            | 0,0564          | 0,8298        |
| Survival since 1st recurrence | CD45+/CD11b+/CD14+/HLADR+     | 0,3057          | 0,2328        |
| Survival since 1st recurrence | CD45+/CD11b+/CD14+/PD-L1+     | 0,6324          | 0,0065*       |
| Survival since 1st recurrence | CD45+/CD11b+/CD14+/CD86+      | -0,0637         | 0,8080        |
| Survival since 1st recurrence | Overall Survival              | 0,8535          | <,0001*       |
| Survival since vaccination    | living cells                  | -0,0165         | 0,9481        |
| Survival since vaccination    | HLADR+                        | 0,1890          | 0,4527        |
| Survival since vaccination    | PD-L1+                        | 0,3523          | 0,1517        |
| Survival since vaccination    | CD86+                         | 0,0743          | 0,7694        |
| Survival since vaccination    | CD45+                         | 0,1834          | 0,4664        |
| Survival since vaccination    | HLADR+/CD45+                  | 0,1209          | 0,6328        |
| Survival since vaccination    | CD45+/PD-L1+                  | 0,3893          | 0,1103        |
| Survival since vaccination    | CD45+/CD86+                   | 0,1229          | 0,6272        |
| Survival since vaccination    | CD45+/CD11b+                  | -0,1208         | 0,6330        |
| Survival since vaccination    | CD45+/CD11b+/CD14+            | 0,1208          | 0,6330        |
| Survival since vaccination    | CD45+/CD11b+/CD14+/HLADR+     | 0,2260          | 0,3673        |
| Survival since vaccination    | CD45+/CD11b+/CD14+/PD-L1+     | 0,4430          | 0,0656        |
| Survival since vaccination    | CD45+/CD11b+/CD14+/CD86+      | 0,0279          | 0,9126        |
| Survival since vaccination    | Overall Survival              | 0,3487          | 0,1562        |
| Survival since vaccination    | Survival since 1st recurrence | 0,7712          | 0,0005*       |
| Survival since vaccination    | Nr of vaccines                | 0,6921          | 0,0015*       |

**Supplementary Material Table S1. Spearman's non-parametric correlation.** The table reports the values of Spearman's coefficient (significant when >0.6), and the corresponding p-values, where significance levels are highlighted by the colors red (p<0.05) or orange (p<0.01 or p<0.001).
